# Supplementary material for: A FRET-based ‘off–on’ molecular switch: an effective design strategy for the selective detection of nanomolar Al3+ ions in aqueous media
Source: Royal Society of Chemistry journal article supplement (doi:10.1039/c4ra02378a), 2014-01-01
Supplement: c4ra02378a1.pdf [file c4ra02378a1.pdf]

*Supporting Information*

**A FRET based ‘off-on’ molecular switch: an effective design strategy for selective detection of nanomolar Al<sup>3+</sup> ions in aqueous media<sup>†</sup>**

Buddhadeb Sen,<sup>a</sup> Siddhartha Pal,<sup>a</sup> Somenath Lohar,<sup>a</sup> Manjira Mukherjee,<sup>a</sup> Sushil Kumar Mandal,<sup>b</sup> Anisur Rahman Khuda-Bukhsh,<sup>b</sup> and Pabitra Chattopadhyay<sup>\*,a</sup>

<sup>a</sup>Department of Chemistry, The University of Burdwan, Golapbag, Burdwan, 713104, India,

<sup>b</sup>Molecular Biology and Genetics Laboratory, Department of Zoology, Kalyani University, India

Corresponding author: [pabitracc@yahoo.com](mailto:pabitracc@yahoo.com)

## CONTENTS

1. **Fig. S1A** FTIR spectrum of probe (**L**<sup>1</sup>)
2. **Fig. S1B** ESI-MS spectrum of probe (**L**<sup>1</sup>) in MeOH
3. **Fig. S1C** <sup>1</sup>H NMR of the probe (**L**<sup>1</sup>) in CDCl<sub>3</sub>
4. **Fig. S1D** <sup>13</sup>C NMR of the probe (**L**<sup>1</sup>) in CDCl<sub>3</sub>
5. **Fig. S2A** FTIR spectrum of [Al(L)(NO<sub>3</sub>)<sub>2</sub>]
6. **Fig. S2B** ESI-MS spectrum of [Al(L)(NO<sub>3</sub>)<sub>2</sub>] in MeOH
7. **Fig. S2C** <sup>1</sup>H NMR of [Al(L)(NO<sub>3</sub>)<sub>2</sub>] in CDCl<sub>3</sub>
8. **Fig. S2D** <sup>13</sup>C NMR spectrum of [Al(L)(NO<sub>3</sub>)<sub>2</sub>] in DMSO-d<sub>6</sub>
9. **Scheme S1** Synthesis of L-Al Complex as [Al(L)(NO<sub>3</sub>)<sub>2</sub>]
10. **Fig. S3** Job's plot analysis from UV-vis data showing maximum absorption at 1:1 ratio [**L**<sup>1</sup>: Al<sup>3+</sup>]
11. **Fig. S4** Effect of pH in absence of Al<sup>3+</sup> ions and in presence of Al<sup>3+</sup> ions in HEPES buffer (1 mM, pH 7.4; 2% EtOH) at 25°C
12. **Fig. S5** Detection limit of Al<sup>3+</sup> ions (33 x 10<sup>-9</sup> M) in HEPES buffer (1 mM, pH 7.4; 2% EtOH) at λ<sub>em</sub> = 588 nm
13. **Fig. S6** Calibration curve in the nanomolar range (0-300 nM) for calculating the LOD (6.19 nM) of Al<sup>3+</sup> by **L**<sup>1</sup> in HEPES buffer (1 mM, pH 7.4; 2% EtOH) at 25 °C
14. **Fig. S7** Fluorescence intensity assay of **L**<sup>1</sup> in presence of different metal ion salts in HEPES buffer (1 mM, pH 7.4; 2% EtOH) at λ<sub>em</sub> = 588 nm
15. **Fig. S8** Visual color change of the probe due to the addition of different cations in HEPES buffer (1 mM, pH 7.4; 2% EtOH)
16. **Fig. S9** Fluorescence color of the probe in absence and presence of different metal ions in HEPES buffer (1 mM, pH 7.4; 2% EtOH)
17. **Fig. S10** Signaling of Al<sup>3+</sup> ions by **L**<sup>1</sup> in the presence of 10-50 eq. of competitive ions in HEPES buffer (1 mM, pH 7.4; 2% EtOH) at λ<sub>ex</sub> = 550 nm
18. **Fig. S11** Overlap spectra of donor emission and acceptor absorbance of **L**<sup>1</sup> (10 μM) in HEPES buffer (1 mM, pH 7.4; 2% EtOH)
19. **Fig. S12** Binding constant (K) value 5.81 x 10<sup>6</sup> M<sup>-1</sup> determined from the determined from the intercept/slope of the plots resulting in the interactions of **L**<sup>1</sup> with Al<sup>3+</sup>
20. **Fig. S13** Partial <sup>1</sup>H NMR spectra for **L**<sup>1</sup> (10 mM) in presence of varying [Al<sup>3+</sup>] [ A) 0 mM, B) 5 mM and C) 10 mM] in CDCl<sub>3</sub>
21. **Fig. S14** Time resolved fluorescence decay of **L**<sup>1</sup> in absence and presence of added Al<sup>3+</sup> ions at λ<sub>em</sub> = 588nm
22. **Fig. S15** Cytotoxic effect of **L**<sup>1</sup> (5, 10, 20, 50 and 100 μM) in HeLa cells incubated for 6 h

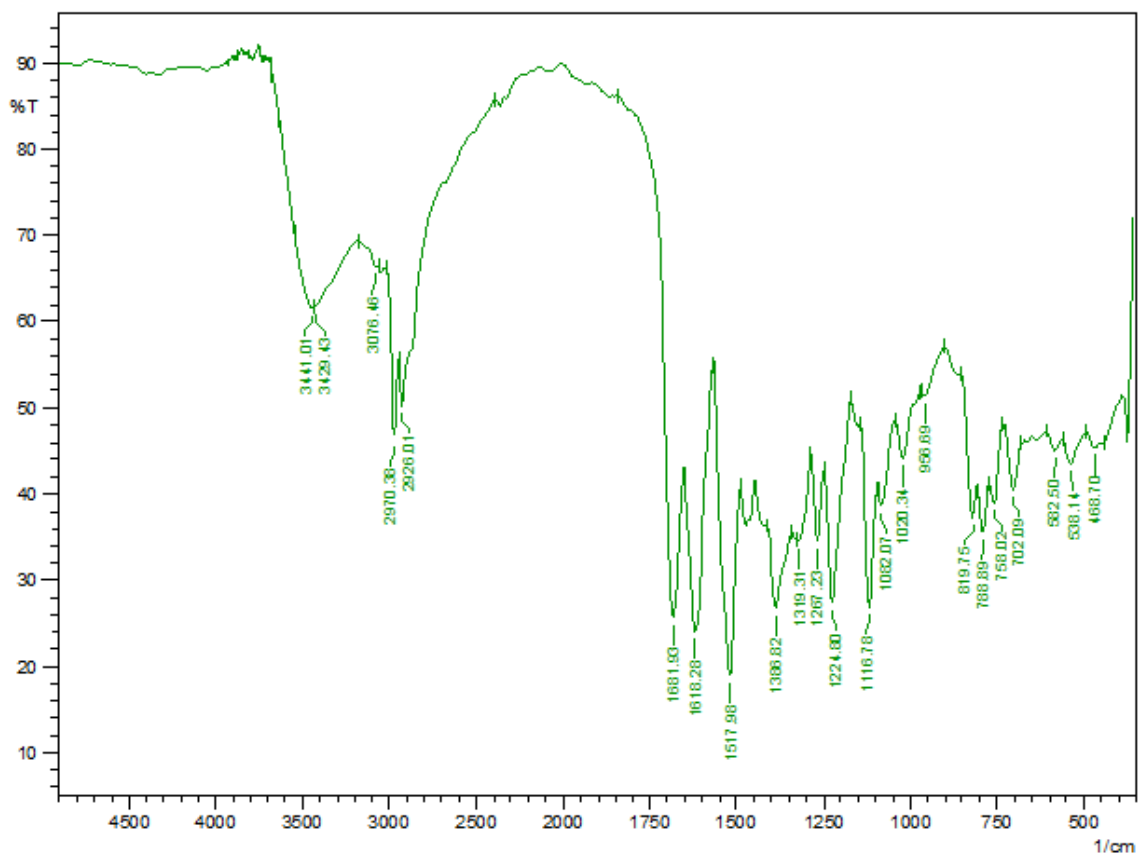

Fig. S1A FTIR spectrum of probe (L)

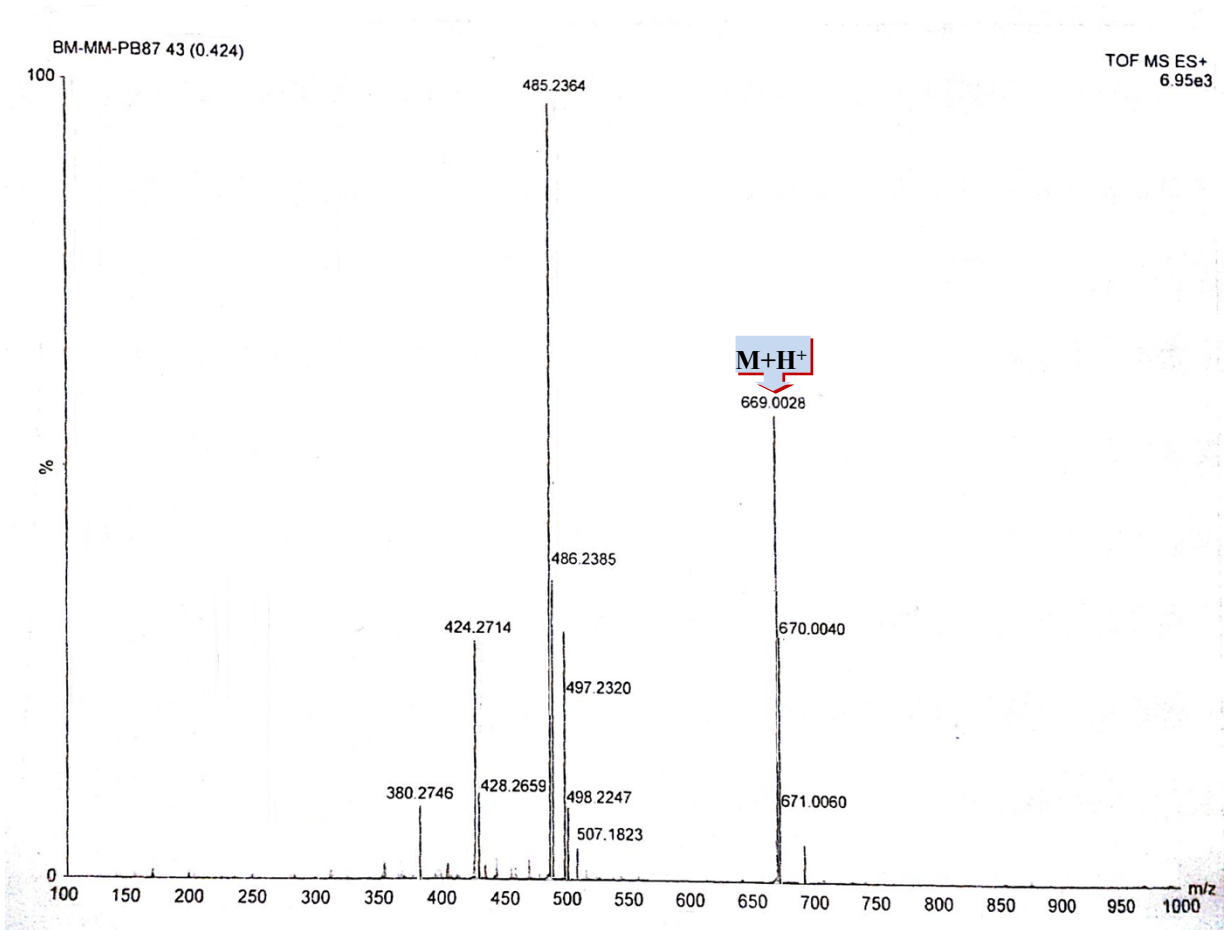

Fig. S1B ESI-MS spectrum of probe ( $L^1$ ) in MeOH

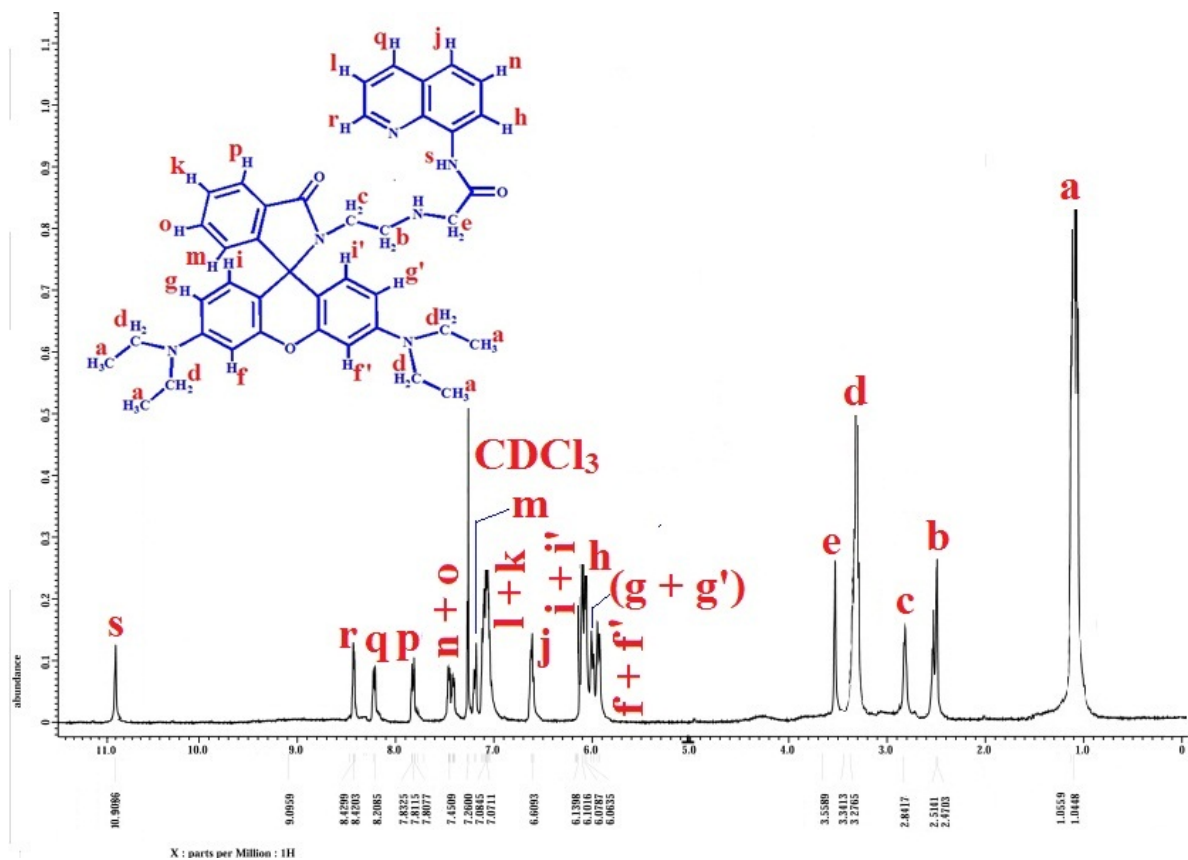

Fig. S1C <sup>1</sup>H NMR of the probe (L<sup>1</sup>) in CDCl<sub>3</sub>

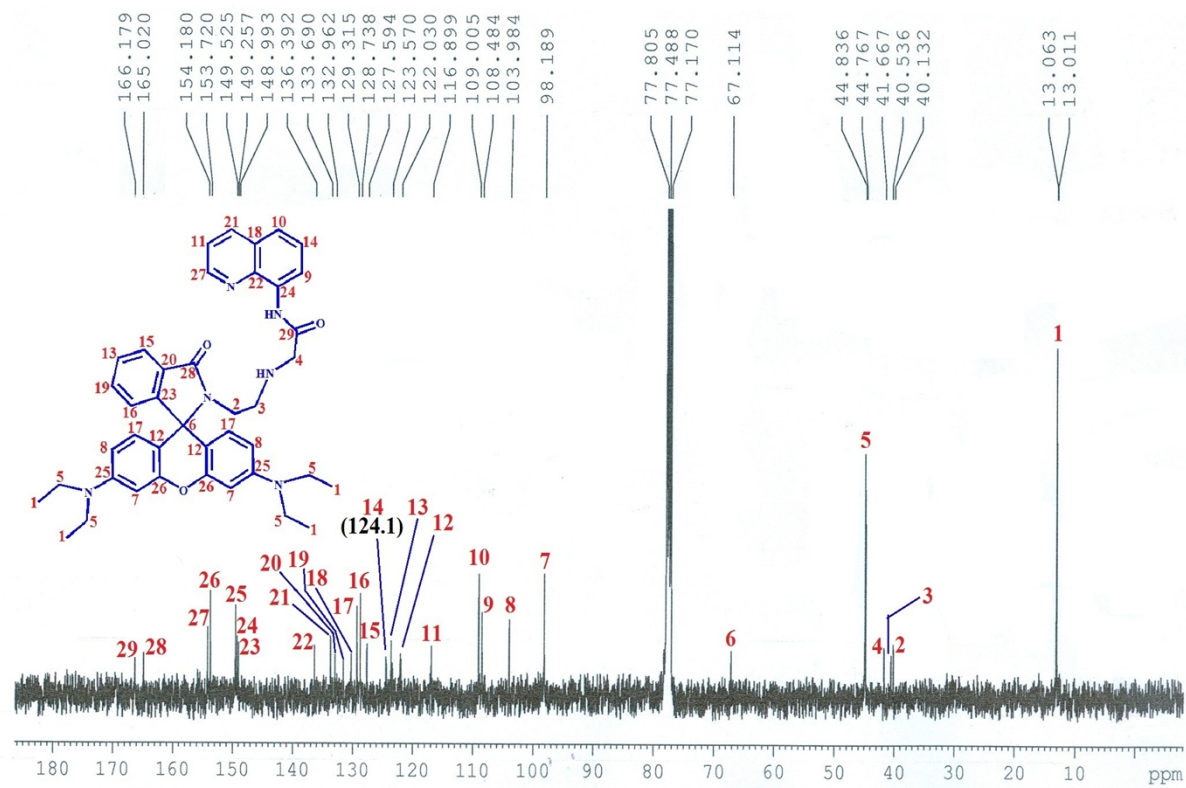

**Fig. S1D**  $^{13}\text{C}$  NMR of the probe ( $\text{L}^1$ ) in  $\text{CDCl}_3$

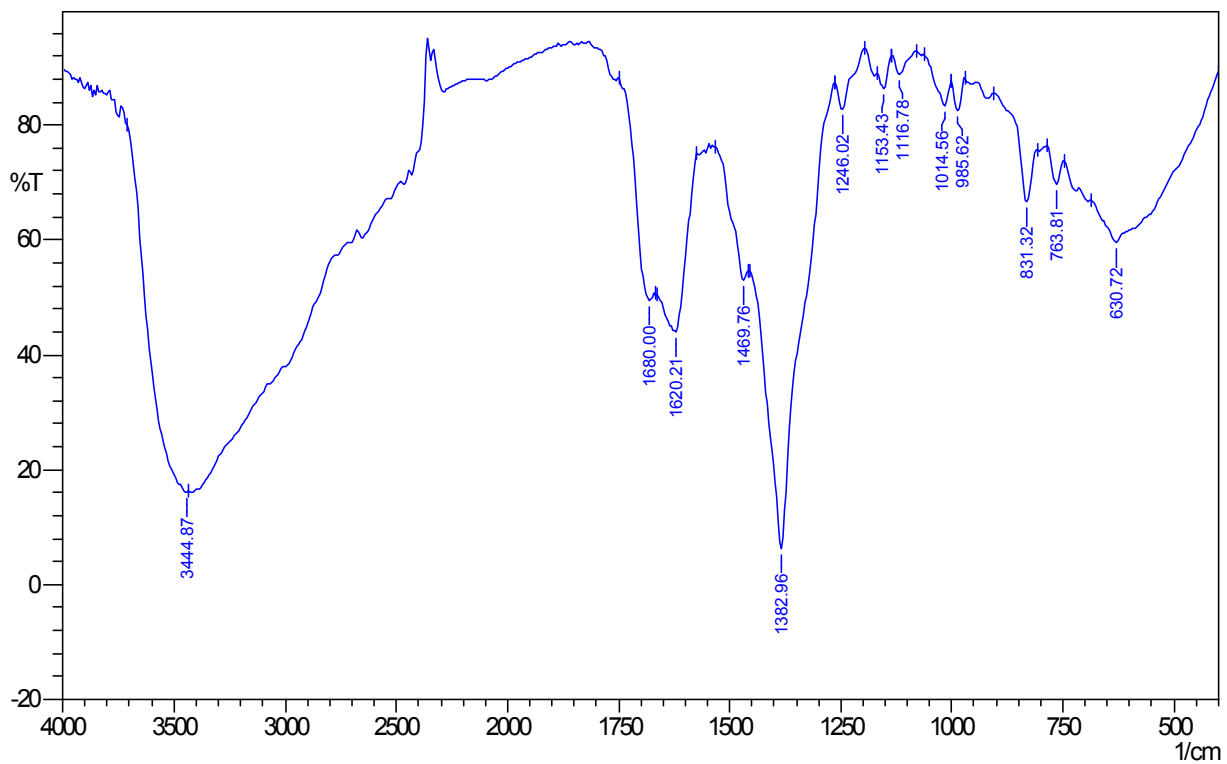

**Fig. S2A** FTIR spectrum of [Al(L)(NO<sub>3</sub>)<sub>2</sub>]

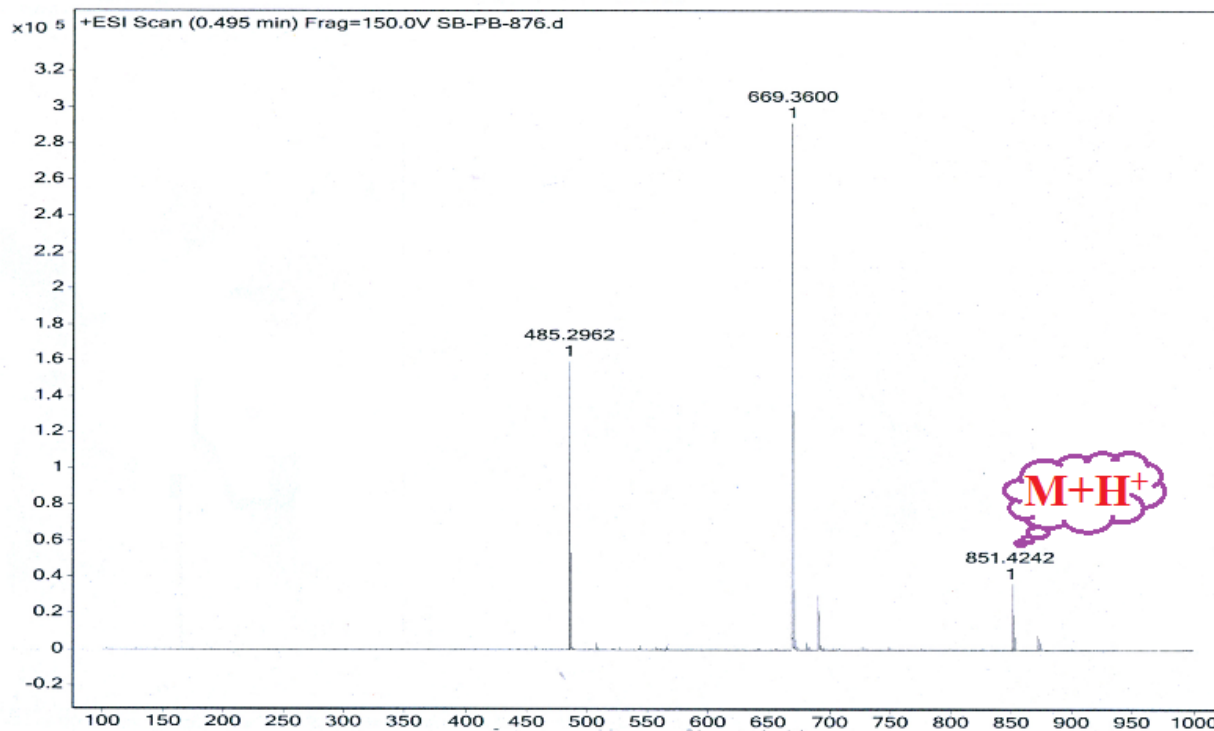

Fig. S2B ESI-MS spectrum of  $[Al(L)(NO_3)_2]$  in MeOH



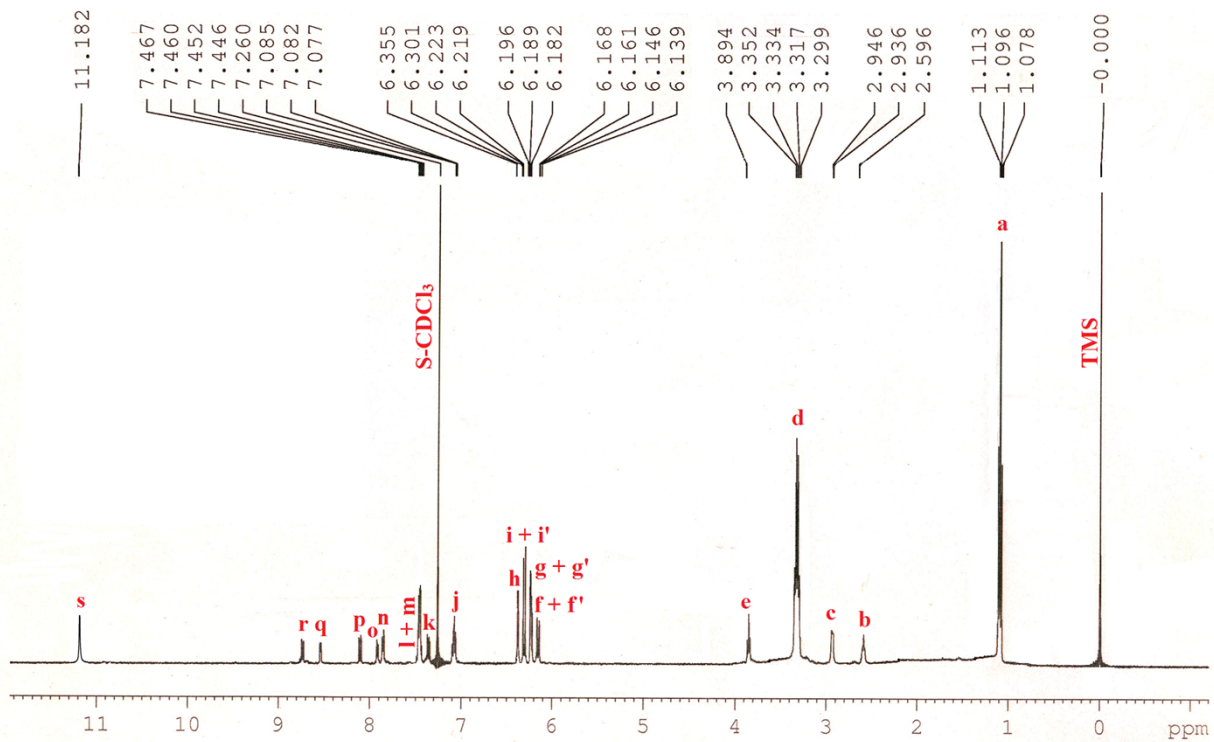

Fig. S2C <sup>1</sup>H NMR of [Al(L)(NO<sub>3</sub>)<sub>2</sub>] in CDCl<sub>3</sub>

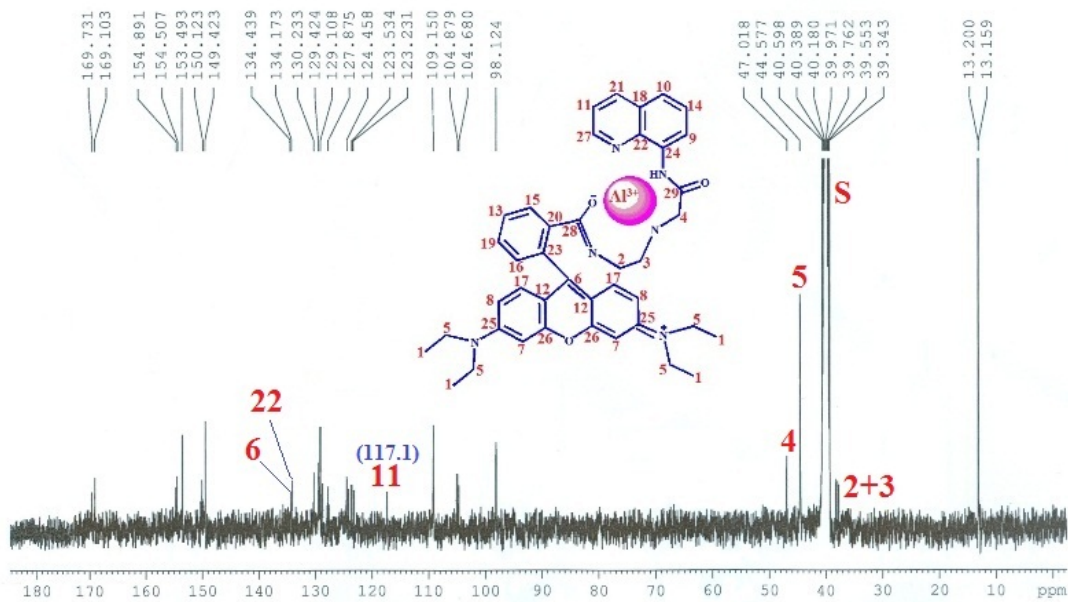

Fig. S2D  $^{13}\text{C}$  NMR spectrum of  $[\text{Al}(\text{L})(\text{NO}_3)_2]$  in  $\text{DMSO-d}_6$

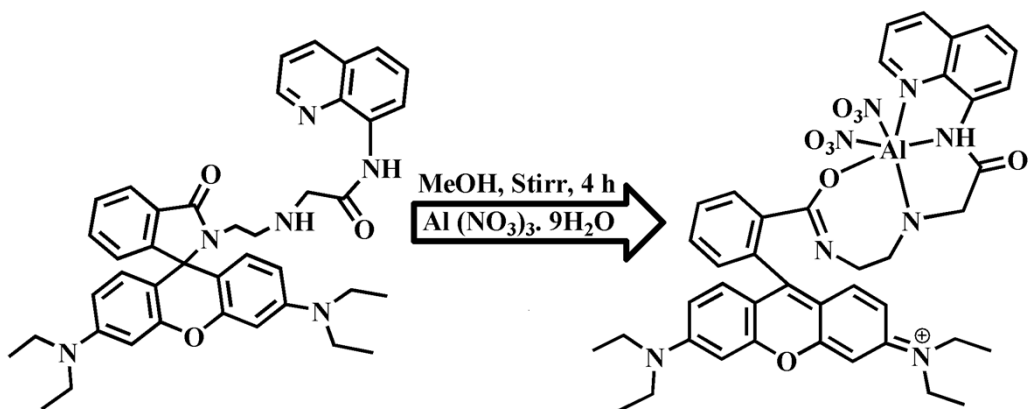

Scheme S1 Synthesis of L-Al Complex as  $[\text{Al(L)(NO}_3)_2]$

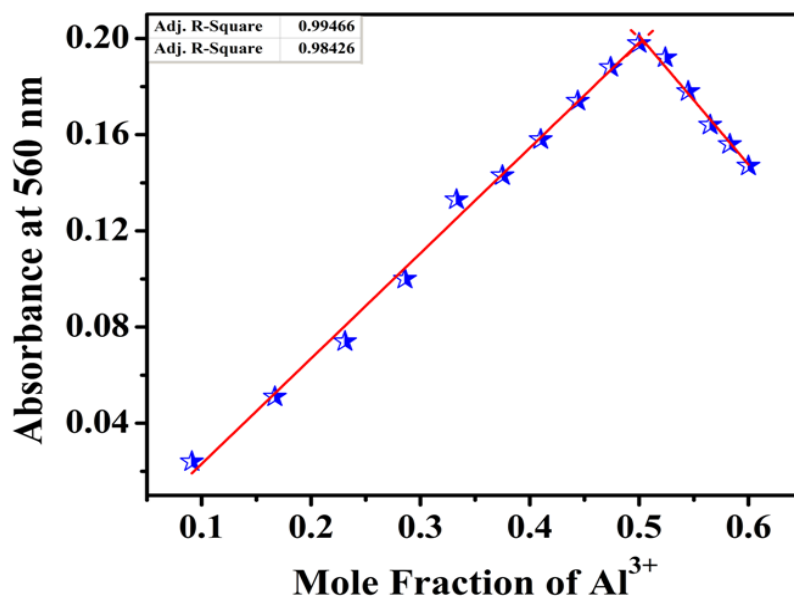

Fig. S3 Job's plot analysis from UV-vis data showing maximum absorption at 1:1 ratio  $[\text{L}^1: \text{Al}^{3+}]$  at  $\lambda_{\text{em}} = 588 \text{ nm}$

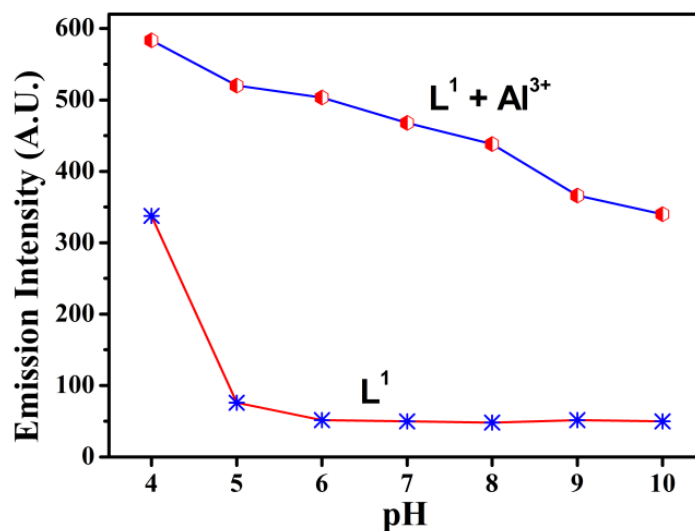

**Fig. S4** Effect of pH in absence of  $Al^{3+}$  ions and in presence of  $Al^{3+}$  ions in HEPES buffer (1 mM, pH 7.4; 2% EtOH) at 25°C at  $\lambda_{em} = 588$  nm

### Detection Limit

The detection limit was determined from the fluorescence titration data at  $\lambda_{em}$  588 nm using one earlier reported method by Veciana et. al.<sup>1a</sup> as well as by  $3\sigma$  method.<sup>1b</sup> Results showed that both were comparable with each other.

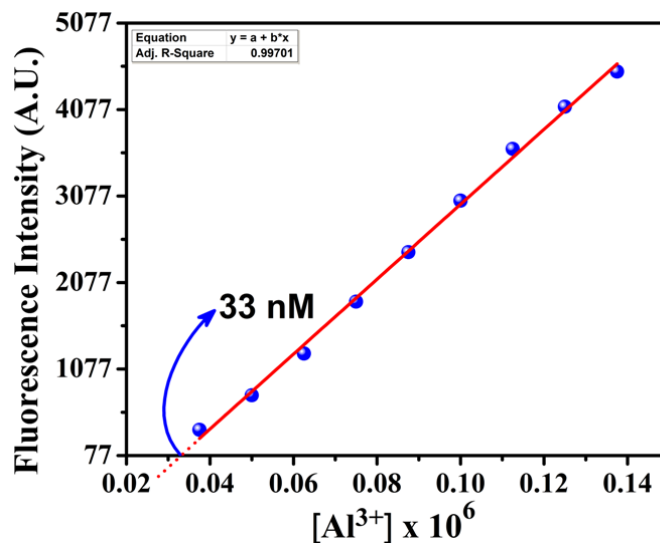

**Fig. S5** Detection limit of  $Al^{3+}$  (33  $\times 10^{-9}$  M) in HEPES buffer (1 mM, pH 7.4; 2% EtOH) at  $\lambda_{em} = 588$  nm

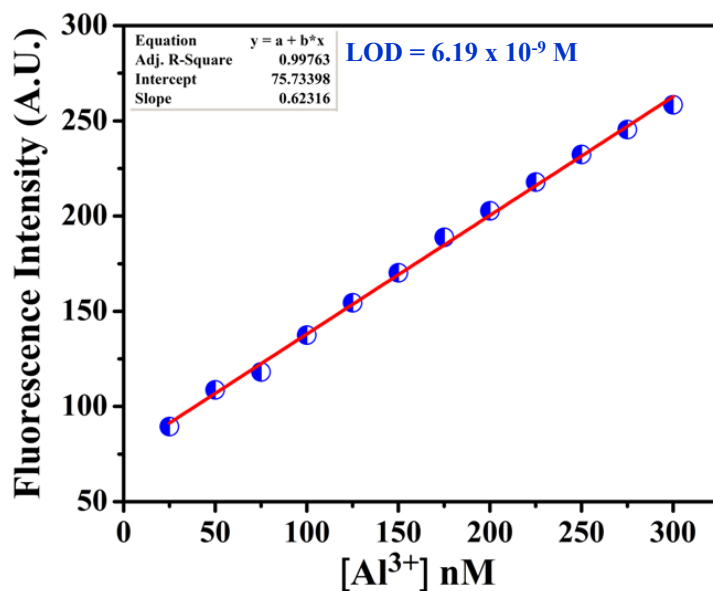

Fig. S6 Calibration curve in the nanomolar range (0-300 nM) for calculating the LOD of  $\text{Al}^{3+}$  by  $\text{L}^1$  in HEPES buffer (1 mM, pH 7.4; 2% EtOH) at 25 °C [Here,  $S = 0.62316$ ,  $\sigma = 1.286$ ,  $\text{LOD} (C_L) = 3\sigma/S = 6.19$  nM]

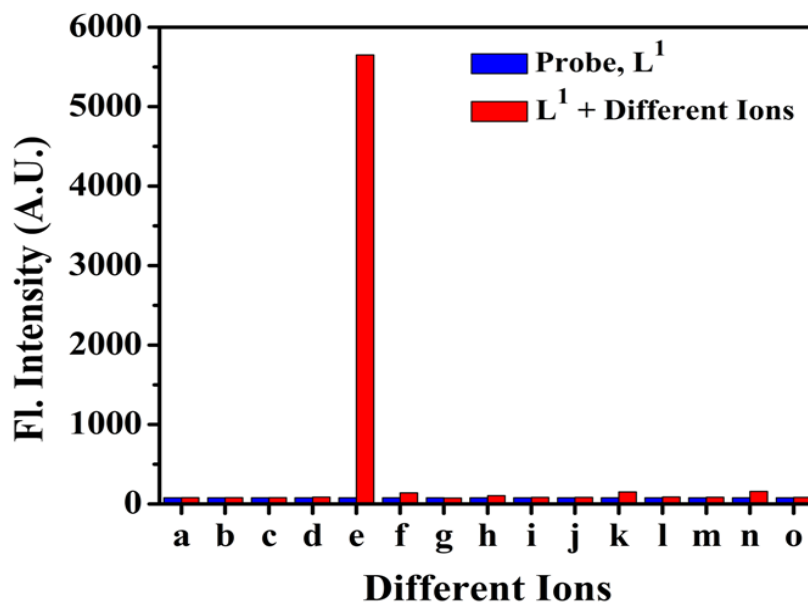

Fig. S7 Fluorescence intensity assay of  $\text{L}^1$  in presence of different metal ion salts in HEPES buffer (1 mM, pH 7.4; 2% EtOH) at 25 °C ( $\lambda_{\text{ex}} = 550$  nm), a)  $\text{Na}^+$ , b)  $\text{K}^+$ , c)  $\text{Ca}^{2+}$ , d)  $\text{Mg}^{2+}$ , e)  $\text{Al}^{3+}$ , f)  $\text{Cr}^{3+}$ , g)  $\text{Mn}^{2+}$ , h)  $\text{Fe}^{3+}$ , i)  $\text{Co}^{2+}$ , j)  $\text{Ni}^{2+}$ , k)  $\text{Cu}^{2+}$ , l)  $\text{Zn}^{2+}$ , m)  $\text{Cd}^{2+}$ , n)  $\text{Hg}^{2+}$ , and o)  $\text{Pb}^{2+}$  at  $\lambda_{\text{em}} = 588$  nm.

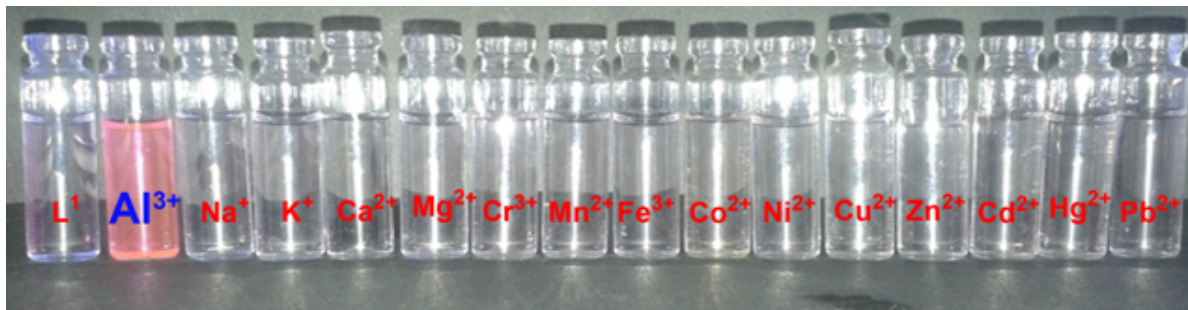

**Fig. S8** Visual color change of the probe due to the addition of different cations in HEPES buffer (1 mM, pH 7.4; 2% EtOH)

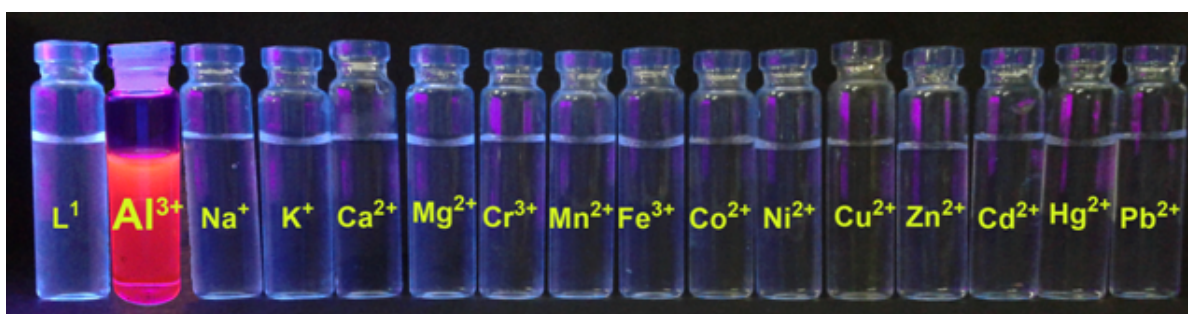

**Fig. S9** Fluorescence color of the probe in absence and presence of different metal ions in HEPES buffer (1 mM, pH 7.4; 2% EtOH)

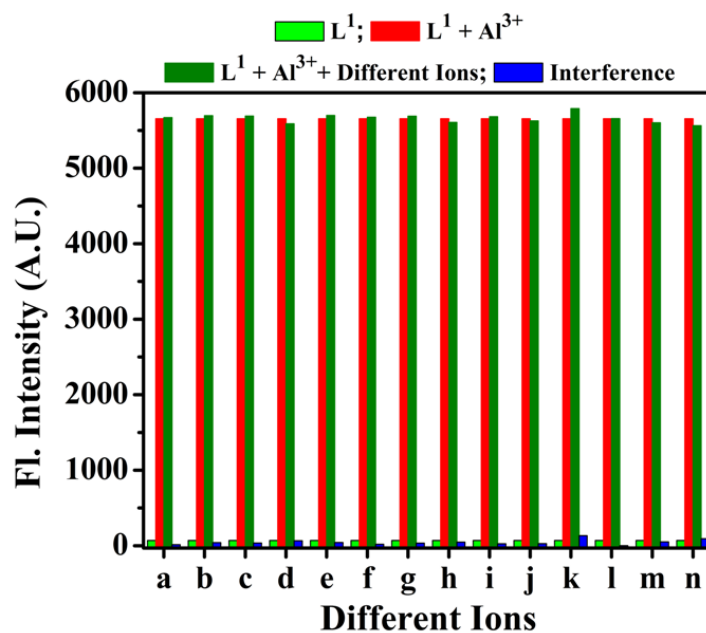

**Fig. S10** Signaling of Al<sup>3+</sup> ions by L<sup>1</sup> in the presence of 10-50 eq. of competitive a) Na<sup>+</sup>, b) K<sup>+</sup>, c) Ca<sup>2+</sup>, d) Mg<sup>2+</sup>, e) Cr<sup>3+</sup>, f) Mn<sup>2+</sup>, g) Fe<sup>3+</sup>, h) Co<sup>2+</sup>, i) Ni<sup>2+</sup>, j) Cu<sup>2+</sup>, k) Zn<sup>2+</sup>, l) Cd<sup>2+</sup>, m) Hg<sup>2+</sup>, and n) Pb<sup>2+</sup> ions in HEPES buffer (1 mM, pH 7.4; 2% EtOH) at 25 °C at  $\lambda_{\text{ex}} = 550 \text{ nm}$

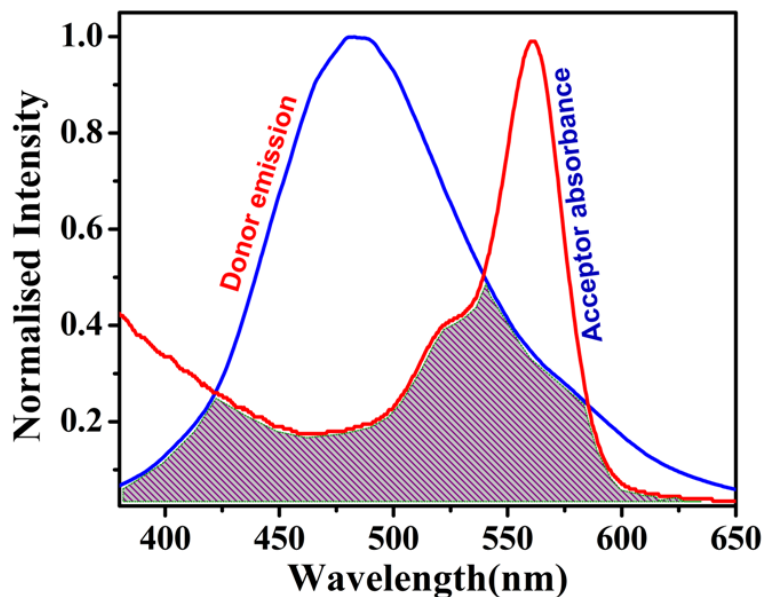

**Fig. S11** Overlap spectra of donor emission and acceptor absorbance of  $L^1$  (10  $\mu$ M) in HEPES buffer (1 mM, pH 7.4; 2% EtOH)

**Binding Constant:** The binding constant value was determined from the emission intensity data following the modified Benesi-Hildebrand equation.<sup>2</sup>

$$1/\Delta F = 1/\Delta F_{\max} + (1/K[C])(1/\Delta F_{\max}), \Delta F = F_x - F_0, \Delta F_{\max} = F_{\infty} - F_0$$

$$\text{i.e. } (F_{\infty} - F_0) / (F_x - F_0) = 1 + 1/K[C]$$

where  $F_0$ ,  $F_x$ , and  $F_{\infty}$  are the emission intensities of organic moiety considered in the absence of  $Al^{3+}$  ions, at an intermediate  $Al^{3+}$  concentration, and at a concentration of complete interaction, respectively, and where  $K$  is the association constant and  $[C]$  is the  $Al^{3+}$  concentration.  $K$  value ( $5.81 \times 10^6 \text{ M}^{-1}$ ) was calculated from the intercept/slope using the plot of  $(F_{\infty} - F_0) / (F_x - F_0)$  against  $[C]^{-1}$ .

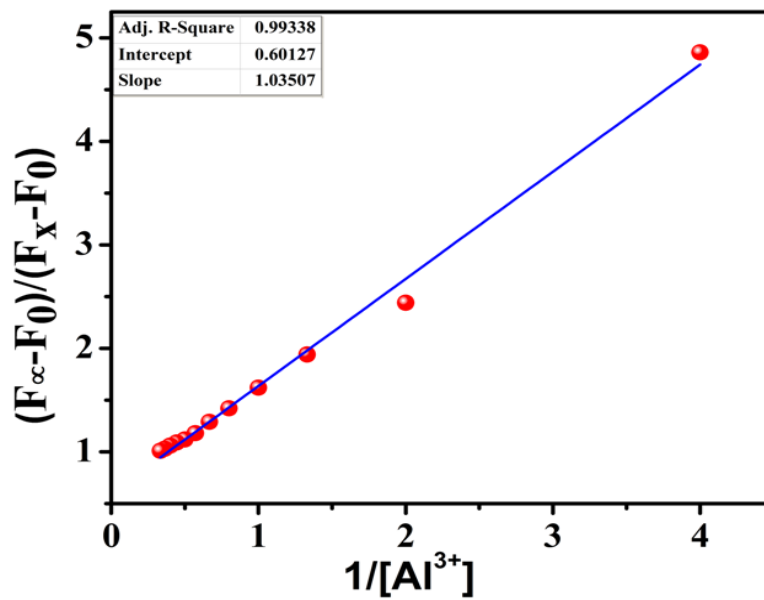

**Fig. S12** Binding constant (K) value  $5.81 \times 10^6 \text{ M}^{-1}$  determined from the determined from the intercept/slope of the plots resulting in the interactions of  $\text{L}^1$  with  $\text{Al}^{3+}$



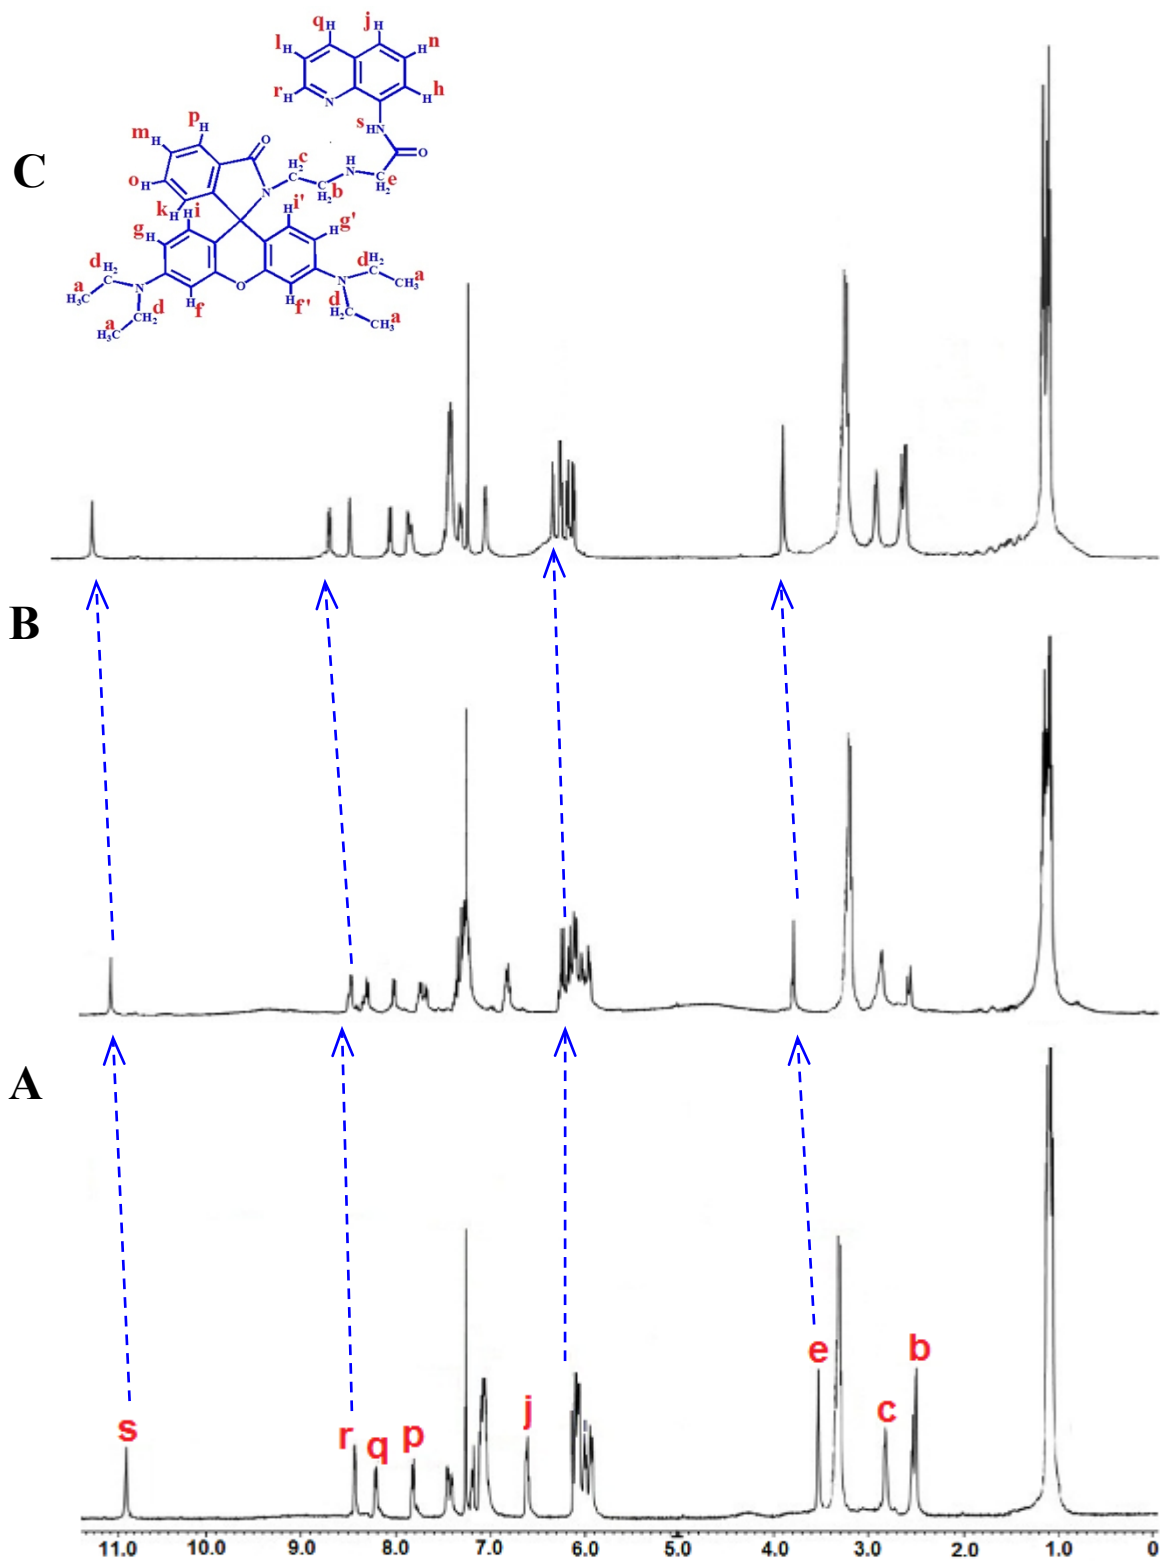

**Fig. S13** Partial  $^1\text{H}$  NMR spectra for  $L^1$  (10 mM) in presence of varying  $[\text{Al}^{3+}]$  [ A) 0 mM, B) 5 mM, and C) 10 mM] in  $\text{CDCl}_3$

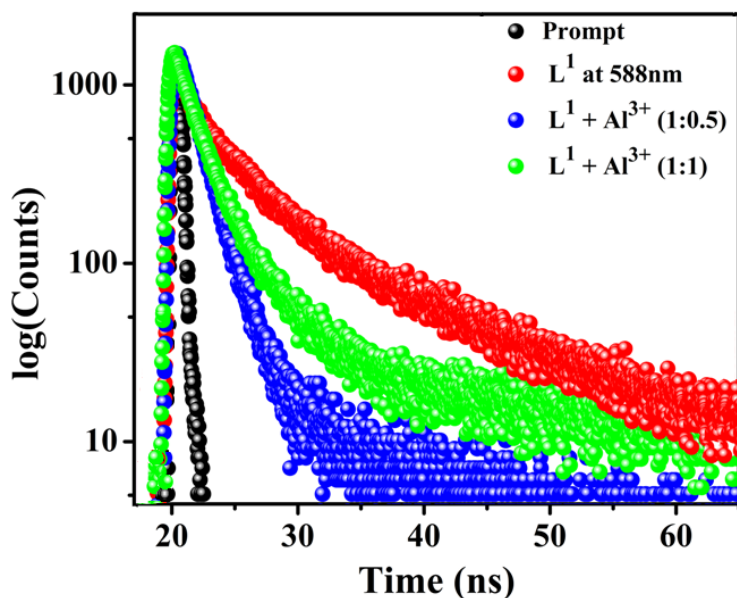

**Fig. S14** Time resolved fluorescence decay of  $L^1$  (10 $\mu$ M) in absence and presence of added  $Al^{3+}$  in HEPES buffer (1 mM, pH 7.4; 2% EtOH) at 25 °C using a nano LED of 377 nm as the light source at  $\lambda_{em} = 588$ nm

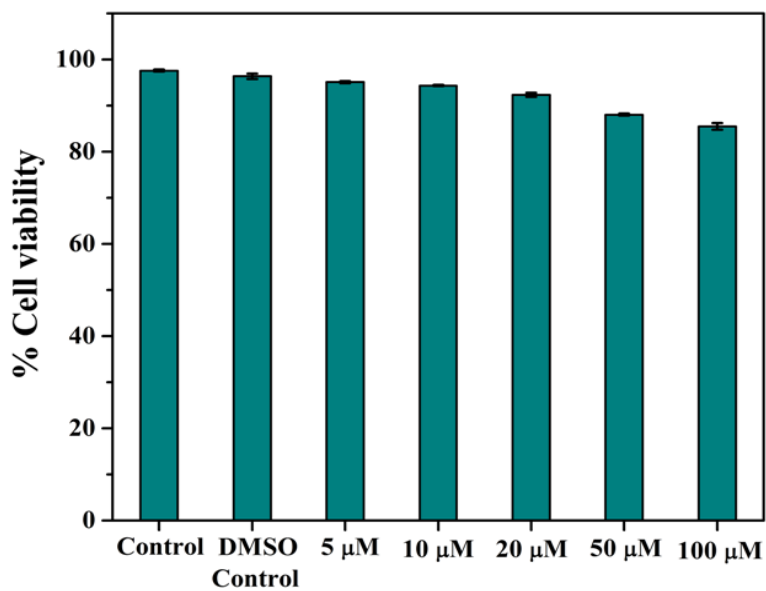

**Fig. S15** Cytotoxic effect of  $L^1$  (5, 10, 20, 50 and 100  $\mu$ M) in HeLa cells incubated for 6 h

#### Reference

- (1) (a) A. Caballero, R. Martinez, V. Lloveras, I. Ratera, J. V. Gancedo, K. Wurst, A. Tarraga, P. Molina, J. Veciana, *J. Am. Chem. Soc.*, 2005, **127**, 15666; (b) A. Hakonen, *Anal. Chem.*, 2009, **81**, 4555.
- (2) H. A. Benesi, J. H. Hildebrand, *J. Am. Chem. Soc.*, 1949, **71**, 2703.
